# Supplementary material for: Mutational landscape and DNA methylation-based classification of squamous cell carcinoma and urothelial carcinoma
Source: Research Square preprint supplement (doi:10.21203/rs.3.rs-5812505/v1), 2025-04-14
Supplement: Supplementary file 1 [file 2df5757e1620ae59c7234528.xlsx]

## Sheet: FUSCC validation set 1
Sample ID	primary/metastatic (site)	Tumor cell content (%)	Prediction label	Prediction score	Consistency
BLCA-1	primary	50	BLCA	0.8639	TRUE
BLCA-2	primary	80	BLCA	0.9792	TRUE
BLCA-3	primary	80	BLCA	0.9815	TRUE
BLCA-4	primary	25	BLCA	0.8073	TRUE
BLCA-5	primary	60	BLCA	0.9919	TRUE
BLCA-6	primary	90	BLCA	0.9755	TRUE
BLCA-7	primary	90	BLCA	0.8635	TRUE
BLCA-8	primary	70	BLCA	0.9643	TRUE
BLCA-9	primary	50	BLCA	0.8816	TRUE
BLCA-10	primary	50	BLCA	0.9514	TRUE
BLCA-11	primary	80	BLCA	0.9771	TRUE
BLCA-12	primary	50	BLCA	0.9595	TRUE
BLCA-13	primary	70	BLCA	0.8868	TRUE
BLCA-14	primary	40	BLCA	0.9707	TRUE
BLCA-15	primary	70	BLCA	0.9532	TRUE
BLCA-16	primary	40	BLCA	0.958	TRUE
BLCA-17	primary	80	BLCA	0.9815	TRUE
BLCA-18	primary	80	ESCC	0.5369	FALSE
BLCA-19	primary	60	BLCA	0.9429	TRUE
BLCA-20	primary	80	BLCA	0.947	TRUE
BLCA-21	metastatic (Abdominal wall)	40	BLCA	0.7298	TRUE
BLCA-22	metastatic (Pelvic lymph node)	20	BLCA	0.4559	TRUE
BLCA-23	metastatic (Retroperitoneal lymph node)	80	BLCA	0.8797	TRUE
BLCA-24	metastatic (Hilar lymph node)	80	BLCA	0.841	TRUE
CESC-1	primary	80	BLCA	0.6924	FALSE
CESC-2	primary	70	CESC	0.4661	TRUE
CESC-3	primary	75	BLCA	0.2874	FALSE
CESC-4	primary	80	CESC	0.7798	TRUE
CESC-5	primary	80	CESC	0.6868	TRUE
CESC-6	primary	90	CESC	0.8423	TRUE
CESC-7	primary	80	CESC	0.8108	TRUE
CESC-8	primary	70	HNSCC	0.286	FALSE
CESC-9	primary	90	BLCA	0.305	FALSE
CESC-10	primary	70	CESC	0.8388	TRUE
CESC-11	primary	70	CESC	0.3458	TRUE
CESC-12	primary	70	CESC	0.5425	TRUE
CESC-13	primary	80	CESC	0.9102	TRUE
CESC-14	primary	70	CESC	0.5368	TRUE
CESC-15	primary	70	CESC	0.6861	TRUE
CESC-16	primary	60	CESC	0.7958	TRUE
CESC-17	metastatic (Common iliac lymph node)	90	ESCC	0.5135	FALSE
CESC-18	metastatic (Lung)	80	CESC	0.4007	TRUE
CESC-19	metastatic (Thoracic vertebra)	60	CESC	0.3755	TRUE
CESC-20	metastatic (Omentum majus)	60	CESC	0.5806	TRUE
CESC-21	metastatic (Pelvic lymph node)	30	ESCC	0.5075	FALSE
CESC-22	metastatic (Lung)	80	CESC	0.2714	TRUE
CESC-23	metastatic (Common iliac lymph node)	70	CESC	0.6465	TRUE
ESCC-1	primary	40	ESCC	0.922	TRUE
ESCC-2	primary	80	ESCC	0.4172	TRUE
ESCC-3	primary	70	ESCC	0.9834	TRUE
ESCC-4	primary	80	ESCC	0.8545	TRUE
ESCC-5	primary	80	ESCC	0.7848	TRUE
ESCC-6	primary	70	ESCC	0.9305	TRUE
ESCC-7	primary	80	ESCC	0.9506	TRUE
ESCC-8	primary	60	ESCC	0.7118	TRUE
ESCC-9	primary	50	ESCC	0.6205	TRUE
ESCC-10	primary	60	ESCC	0.9268	TRUE
ESCC-11	primary	70	ESCC	0.8528	TRUE
ESCC-12	primary	70	ESCC	0.8819	TRUE
ESCC-13	primary	60	ESCC	0.7657	TRUE
ESCC-14	primary	70	ESCC	0.8473	TRUE
ESCC-15	primary	40	ESCC	0.8673	TRUE
ESCC-16	primary	90	ESCC	0.8952	TRUE
ESCC-17	primary	50	ESCC	0.8922	TRUE
ESCC-18	primary	70	ESCC	0.8307	TRUE
ESCC-19	primary	70	ESCC	0.8965	TRUE
ESCC-20	metastatic (Cervical lymph node)	50	ESCC	0.5836	TRUE
ESCC-21	metastatic (Lung)	80	LUSC	0.3031	FALSE
ESCC-22	metastatic (Paracardiac lymph node)	60	ESCC	0.6633	TRUE
ESCC-23	metastatic (Lung)	80	LUSC	0.6095	FALSE
ESCC-24	metastatic (Lung)	80	ESCC	0.6627	TRUE
ESCC-25	metastatic (Paraesophageal lymph node)	70	ESCC	0.6344	TRUE
ESCC-26	metastatic (Supraclavicular lymph node)	40	ESCC	0.709	TRUE
ESCC-27	metastatic (Recurrent laryngeal lymph node)	70	ESCC	0.4842	TRUE
HNSCCC-1	primary	80	HNSCC	0.717	TRUE
HNSCCC-2	primary	60	HNSCC	0.6239	TRUE
HNSCCC-3	primary	80	HNSCC	0.8781	TRUE
HNSCCC-4	primary	80	HNSCC	0.9767	TRUE
HNSCCC-5	primary	75	HNSCC	0.8971	TRUE
HNSCCC-6	primary	80	HNSCC	0.8174	TRUE
HNSCCC-7	primary	70	ESCC	0.7658	FALSE
HNSCCC-8	primary	70	ESCC	0.5623	FALSE
HNSCCC-9	primary	70	HNSCC	0.8854	TRUE
HNSCCC-10	primary	50	HNSCC	0.4908	TRUE
HNSCCC-11	primary	70	HNSCC	0.8067	TRUE
HNSCCC-12	primary	70	HNSCC	0.539	TRUE
HNSCCC-13	primary	40	HNSCC	0.4995	TRUE
HNSCCC-14	primary	80	HNSCC	0.8267	TRUE
HNSCCC-15	primary	60	HNSCC	0.8591	TRUE
HNSCCC-16	metastatic (Cervical lymph node)	25	ESCC	0.6294	FALSE
HNSCCC-17	metastatic (Pelvic lymph node)	60	HNSCC	0.4778	TRUE
HNSCCC-18	metastatic (Brain)	60	HNSCC	0.6718	TRUE
HNSCCC-19	metastatic (Lumbar vertebra)	80	ESCC	0.5938	FALSE
HNSCCC-20	metastatic (Cervical lymph node)	80	HNSCC	0.6381	TRUE
HNSCCC-21	metastatic (Cervical lymph node)	35	HNSCC	0.3859	TRUE
HNSCCC-22	metastatic (Cervical lymph node)	70	HNSCC	0.5047	TRUE
LUSC-1	primary	50	ESCC	0.5777	FALSE
LUSC-2	primary	70	LUSC	0.6878	TRUE
LUSC-3	primary	70	LUSC	0.8272	TRUE
LUSC-4	primary	50	LUSC	0.906	TRUE
LUSC-5	primary	50	LUSC	0.537	TRUE
LUSC-6	primary	80	ESCC	0.4639	FALSE
LUSC-7	primary	70	LUSC	0.907	TRUE
LUSC-8	primary	80	LUSC	0.9255	TRUE
LUSC-9	primary	70	LUSC	0.8491	TRUE
LUSC-10	primary	80	LUSC	0.9019	TRUE
LUSC-11	primary	80	LUSC	0.8796	TRUE
LUSC-12	primary	80	LUSC	0.8955	TRUE
LUSC-13	primary	50	LUSC	0.9326	TRUE
LUSC-14	primary	70	LUSC	0.8181	TRUE
LUSC-15	metastatic (Parbronchial lymph node)	30	ESCC	0.6717	FALSE
LUSC-16	primary	80	LUSC	0.8166	TRUE
LUSC-17	primary	80	LUSC	0.4881	TRUE
LUSC-18	metastatic (Kidney)	30	ESCC	0.442	FALSE
LUSC-19	metastatic (Hilar lymph node)	60	LUSC	0.7931	TRUE
LUSC-20	metastatic (Kidney)	30	LUSC	0.381	TRUE
LUSC-21	primary	80	LUSC	0.677	TRUE
LUSC-22	metastatic (Parbronchial lymph node)	30	ESCC	0.4282	FALSE
LUSC-23	metastatic (Hilar lymph node)	70	LUSC	0.4689	TRUE
