# Supplementary material for: Mutational landscape and DNA methylation-based classification of squamous cell carcinoma and urothelial carcinoma
Source: Research Square preprint supplement (doi:10.21203/rs.3.rs-5812505/v1), 2025-04-14
Supplement: Supplementary file 2 [file 4fc9d1859135de94d357bf19.xlsx]

## Sheet: 106位点权重
CpG	Importance
cg01084693	2.02978
cg27313941	1.03988
cg26687072	2.31438
cg14849140	2.63314
cg09343092	2.39692
cg07823492	1.07449
cg04904318	0.14013
cg17583946	0.995825
cg07049592	0.457465
cg00892567	0.982024
cg13752649	0.441218
cg26634219	0.166284
cg07485775	0.0844439
cg07852402	2.37791
cg22660933	0.0331741
cg10936352	0.274086
cg04271791	0.615803
cg00646731	1.46814
cg01561259	0.26228
cg09646197	1.65196
cg11335133	0.405745
cg10089145	1.27307
cg05343480	0.736771
cg23830290	0.657629
cg04863892	0.369004
cg07145664	1.41402
cg10532384	0.763832
cg17153122	3.00022
cg13661519	0.599196
cg03763508	0.684758
cg02720618	0.544303
cg18585988	0.544914
cg10191210	0.630203
cg18953784	1.06636
cg06786372	0.346268
cg13544006	7.58124
cg01612366	1.36029
cg26333652	0.13788
cg19480724	1.50731
cg19468528	0.187726
cg11246938	0.506417
cg09263516	0.747457
cg08557649	0.768849
cg08198862	0.0482993
cg13905586	0.799026
cg02776128	0.468406
cg13030332	0.332882
cg14434755	0.278191
cg13356117	0.130217
cg06395028	2.05598
cg11423130	0.959968
cg05787952	0.682578
cg26292895	1.67795
cg25228995	0.825207
cg21341817	0.981174
cg25408237	1.08016
cg22149516	2.50936
cg13717446	0.915321
cg20425384	2.77456
cg26347197	0.983997
cg16561266	1.48727
cg02531516	0.466545
cg09143801	1.08025
cg03113878	1.15887
cg06328338	1.81029
cg20562447	0.140606
cg08382235	0.754307
cg04003500	1.99276
cg22289434	0.287846
cg02900995	1.30259
cg14327531	1.09767
cg21929771	1.16835
cg22216738	0.326834
cg25541958	1.50076
cg02500392	0.495588
cg02374996	0.873319
cg17923947	0.367202
cg17749454	0.17552
cg01610488	0.598014
cg27039662	0.338863
cg08545287	0.310443
cg04075191	0.496679
cg16831085	0.882894
cg21981270	1.36259
cg23900712	0.418173
cg04143876	0.999174
cg04194494	0.24344
cg02506353	0.436485
cg17853216	0.748841
cg02125316	0.9578
cg19221545	1.11785
cg08922090	1.02543
cg11272874	0.654004
cg20749769	0.771319
cg10725316	0.859581
cg25123470	0.292094
cg13551227	0.134811
cg19702194	0.0852608
cg21574675	0.133682
cg02928916	1.18416
cg10767350	1.05265
cg10982664	0.262925
cg10096177	1.02248
cg22060611	1.04237
cg24051554	0.635473
cg15153684	0.669899
