# Supplementary material for: Mutational landscape and DNA methylation-based classification of squamous cell carcinoma and urothelial carcinoma
Source: Research Square preprint supplement (doi:10.21203/rs.3.rs-5812505/v1), 2025-04-14
Supplement: Supplementary file 3 [file 78a2968f0bff6aabc575da83.docx]

Supplementary Materials and Methods:

Data analysis of next-generation sequencing

1. Sequence Data Analysis: Variants were filtered using the VarScan fpfilter pipeline, and loci with depths less than 50 were filtered out. Base calling in plasma and tissue samples required at least eight supporting reads for SNV and two and five supporting reads for insertion–deletion variants (Indel), respectively. Variants with population frequency over 0.1% in the ExAC, 1000 Genomes, dbSNP, or ESP6500SI-V2 databases were grouped as single nucleotide polymorphisms (SNPs) and excluded from further analysis. The remaining variants were annotated SnpEff (version 3.6). Structural variants (SVs), including large genomic rearrangements (LGRs), were analyzed using MarkSV (Burning Rock algorithm tool). Copy number variants (CNVs) were analyzed based on the depth of coverage data of capture intervals. Coverage data were corrected against sequencing bias resulting from guanine-cytosine content and probe design. The average coverage of all captured regions was used to normalize the coverage of different samples to comparable scales. Copy number was calculated based on the ratio between the depth of coverage in tumor samples and average coverage of an adequate number (n > 50) of samples without CNV as references per capture interval. The cut-offs for CNV were 1 for copy number deletion and 4 for copy number amplifications.
2. Tumor Mutational Burden (TMB) Estimation: TMB per patient was computed as a ratio between the total number of non-synonymous variants detected and the total coding region size of the gene panel.The variant count included non-synonymous SNVs and Indels detected within the coding region and ± 2bp upstream or downstream region and did not include hotspot variants, CNVs, SVs, and germline SNPs. Only variants with allelic frequency (AF) of ≥ 2% for tissue samples were included in the variant count. For accurate TMB calculation, maximum AF (maxAF) should be ≥ 5% for tissue samples. The total size of the coding region of the panel for estimating TMB is 1.003 Mb.
3. Microsatellite Instability (MSI) Status Assessment: The MSI status of tumor and plasma samples was determined based on a read-count-distribution-based method. When ≥ 30% of the total number of microsatellite markers in a sample were below the threshold, the sample was evaluated as having an MSI-high (MSI-H) status; < 30% were considered microsatellite stable (MSS).
