# Supplementary material for: Mutational landscape and DNA methylation-based classification of squamous cell carcinoma and urothelial carcinoma
Source: Research Square preprint supplement (doi:10.21203/rs.3.rs-5812505/v1), 2025-04-14
Supplement: Supplementary file 4 [file b73f2c2ec3b2a7339f4f4908.xlsx]

## Sheet: Sheet1
TERC	CXCR4	MEF2B	XRCC3	CIC	TP63
MET	DCUN1D1	MLH3	YES1	CREBBP	TSHR
ALK	DDR2	MRE11	ZBTB16	CSF3R	WT1
BRAF	DICER1	MSH3	ZNF703	CSMD3	XPO1
CD274	EIF1AX	MTAP	ZNRF3	CTCF	ZNF217
EWSR1	EIF4E	MTOR	AMER1	CUL3	ACVR1
FGFR1	EPHA2	MUTYH	BBC3	DNMT3A	ASXL2
FGFR2	EPHA5	MYCL	BCL10	DNMT3B	AXIN2
FGFR3	ERBB2	MYC	BCL2L1	DOT1L	BCORL1
NTRK1	ERBB3	MYCN	BCL2	EED	BMPR1A
NTRK2	ERBB4	MYD88	BTG1	EMSY	BRINP3
NTRK3	ERCC1	NBN	CDKN1C	EP300	CDH18
RAF1	ERCC2	NF1	CEBPA	EPHA3	CSMD1
RET	ERCC3	NF2	CENPA	EPHA7	CTNNA1
ROS1	ERCC4	NFE2L2	CRLF2	EPHB1	CUL4A
TMPRSS2	ERCC5	NFKBIA	ERRFI1	FH	CYLD
MITF	ERG	NKX2-1	FGF10	FOXP1	CYP17A1
TERT	ESR1	NOTCH1	FGF6	FUBP1	DAXX
NRG1	EZH2	NPM1	FOXL2	GABRA6	DDR1
BRCA1	FANCA	NRAS	FOXO1	GATA2	DIS3
CDK12	FANCC	NTHL1	H3F3A	GLI1	DNAJB1
CHEK1	FANCD2	PARP1	H3F3B	GRIN2A	DNMT1
CHEK2	FANCE	PAX5	H3F3C	HGF	EPHB4
CTNNB1	FANCF	PBRM1	HIST1H1C	HNF1A	FRS2
EGFR	FANCG	PDCD1LG2	HIST1H2BD	IKBKE	GATA4
EPCAM	FANCM	PDCD1	HIST1H3A	IKZF1	GATA6
FANCI	FAS	PDGFRA	HIST1H3B	IL7R	GNA13
MSH2	FAT1	PDGFRB	HIST1H3C	INPP4A	HDAC1
PMS2	FBXW7	PDK1	HIST1H3D	INPP4B	HSD3B1
PTEN	FGF12	PIK3CA	HIST1H3E	INSR	HSP90AA1
RAD51B	FGF14	PIK3CB	HIST1H3G	KDM5A	IFNGR1
RB1	FGF19	PIK3R1	HIST1H3H	KDM5C	IRF2
ATM	FGF23	PIM1	HIST1H3I	KDM6A	KAT6A
BARD1	FGF3	PMS1	HIST1H3J	KLF4	KEL
BRCA2	FGF4	POLD1	HIST2H3D	KMT2A	KLHL6
BRIP1	FGF7	POLE	HIST3H3	KMT2C	LTK
FANCL	FGFR4	PPARG	HLA-A	LATS1	MAF
MLH1	FLCN	PPM1D	HLA-B	LATS2	MALT1
MSH6	FLT1	PRKAR1A	HLA-C	MAGI2	MAP3K13
PALB2	FLT3	PRKDC	ID3	MED12	MERTK
PPP2R2A	FLT4	PRKN	INHA	MEN1	MGA
RAD51C	FOXA1	PTCH1	INHBA	MPL	MKNK1
RAD51D	FYN	RAB35	IRS1	MST1R	MST1
RAD54L	GATA1	RAC1	IRS2	NCOR1	NAV3
TP53	GATA3	RAD50	JUN	NOTCH2	NCOA3
ABRAXAS1	GEN1	RAD51	LMO1	NOTCH3	NCOR2
AKT1	GID4	RAD52	MYOD1	NOTCH4	NEGR1
AKT2	GNA11	RARA	NKX3-1	NSD1	NT5C2
AKT3	GNAQ	RECQL4	P2RY8	NSD2	NUTM1
APC	GNAS	RHEB	PHOX2B	NUP93	PAK1
ARAF	GPS2	RHOA	PNRC1	PAK3	PAK5
ARFRP1	GREM1	RICTOR	SDHD	PARP3	PARP2
ARID1A	GRM3	RIT1	SOCS1	PGR	PCDH11X
AR	GSK3B	RNF43	SRSF2	PIK3C2G	PIK3C2B
ATR	HDAC2	RPA1	TENT5C	PIK3CG	PIK3C3
ATRX	HOXB13	SDHAF2	VHL	PIK3R2	PIK3CD
AURKA	HRAS	SDHA	ZBTB2	PLCG2	PIK3R3
AURKB	ICOSLG	SDHB	EZR	PPP2R1A	PLK2
AXL	IDH1	SDHC	RSPO2	PPP6C	PRKCI
B2M	IDH2	SETD2	SLC34A2	PRDM1	PTPRO
BAP1	IGF1	SH2D1A	SDC4	PREX2	RAD21
BCL2L2	IGF1R	SLX4	CD74	PTPN11	REL
BLM	IGF2	SMAD2	ETV4	PTPRD	RPS6KA4
BRD7	IL10	SMAD4	ETV5	PTPRS	RPS6KB2
BTG2	IRF4	SMARCA4	ETV6	PTPRT	RPTOR
CALR	JAK1	SMARCB1	BCL2L11	QKI	SH2B3
CASP8	JAK2	SMO	ABL1	RASA1	SHQ1
CBFB	JAK3	SOX17	ABL2	RBM10	SLIT2
CBL	KDR	SOX2	ACVR1B	RUNX1	SMARCD1
CCND1	KEAP1	SOX9	ALOX12B	RUNX1T1	SOX10
CCND2	KIT	SPOP	ARID1B	SF3B1	STAT4
CCND3	KMT2D	SRC	ARID2	SGK1	STAT5A
CCNE1	KRAS	STK11	ARID5B	SMAD3	STAT5B
CD79A	LRP1B	SUFU	ASXL1	SNCAIP	TCF3
CD79B	LYN	TBX3	AXIN1	SPEN	TEK
CDH1	MAP2K1	TET2	BCL6	SPTA1	TET1
CDK4	MAP2K2	TMEM127	BCOR	STAG2	TGFBR1
CDK6	MAP2K4	TNFRSF14	BIRC3	STAT3	TRAF2
CDK8	MAP3K1	TOP2A	BRD4	STK40	TRAF7
CDKN1B	MAPK1	TSC1	BTK	SYK	TRIM58
CDKN2A	MAPK3	TSC2	CARD11	TAF1	TRPC5
CDKN2B	MAX	U2AF1	CDC73	TCF7L2	TYRO3
CDKN2C	MCL1	VEGFA	CDKN1A	TGFBR2	WISP3
CRKL	MDC1	VEGFB	CHD1	TIPARP	XIAP
CSF1R	MDM2	WRN	CHD2	TNFAIP3	YAP1
CTLA4	MDM4	XRCC2	CHD4	TOP1	MIR21
CYP2D6	DPYD	UGT1A1	NSD3
